# Supplementary material for: Bridging Pyroptosis and Immunity: A Comprehensive Study of the Pyroptosis-Related Long Non-Coding RNA Signature in Breast Cancer
Source: MDPI journal article supplement (doi:10.3390/life13071599), 2023-07-21
Supplement: s1 [file s1]

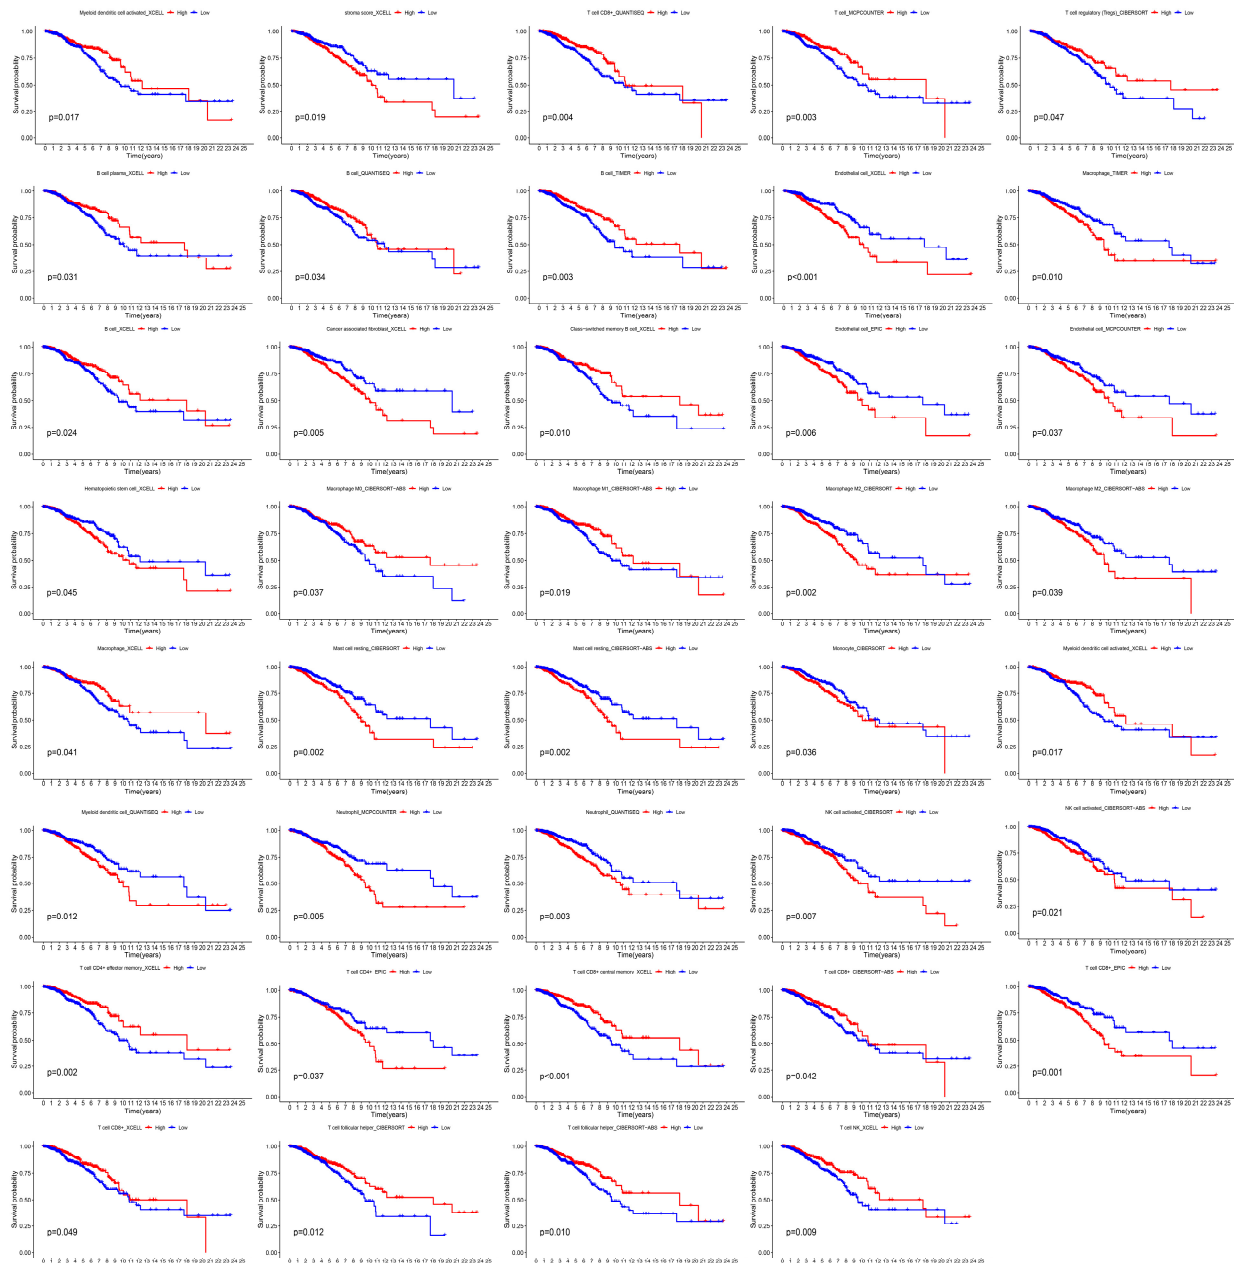

**Figure S1.** K–M analyses of overall survival and the proportion of multiple immune cells calculated using various software tools.

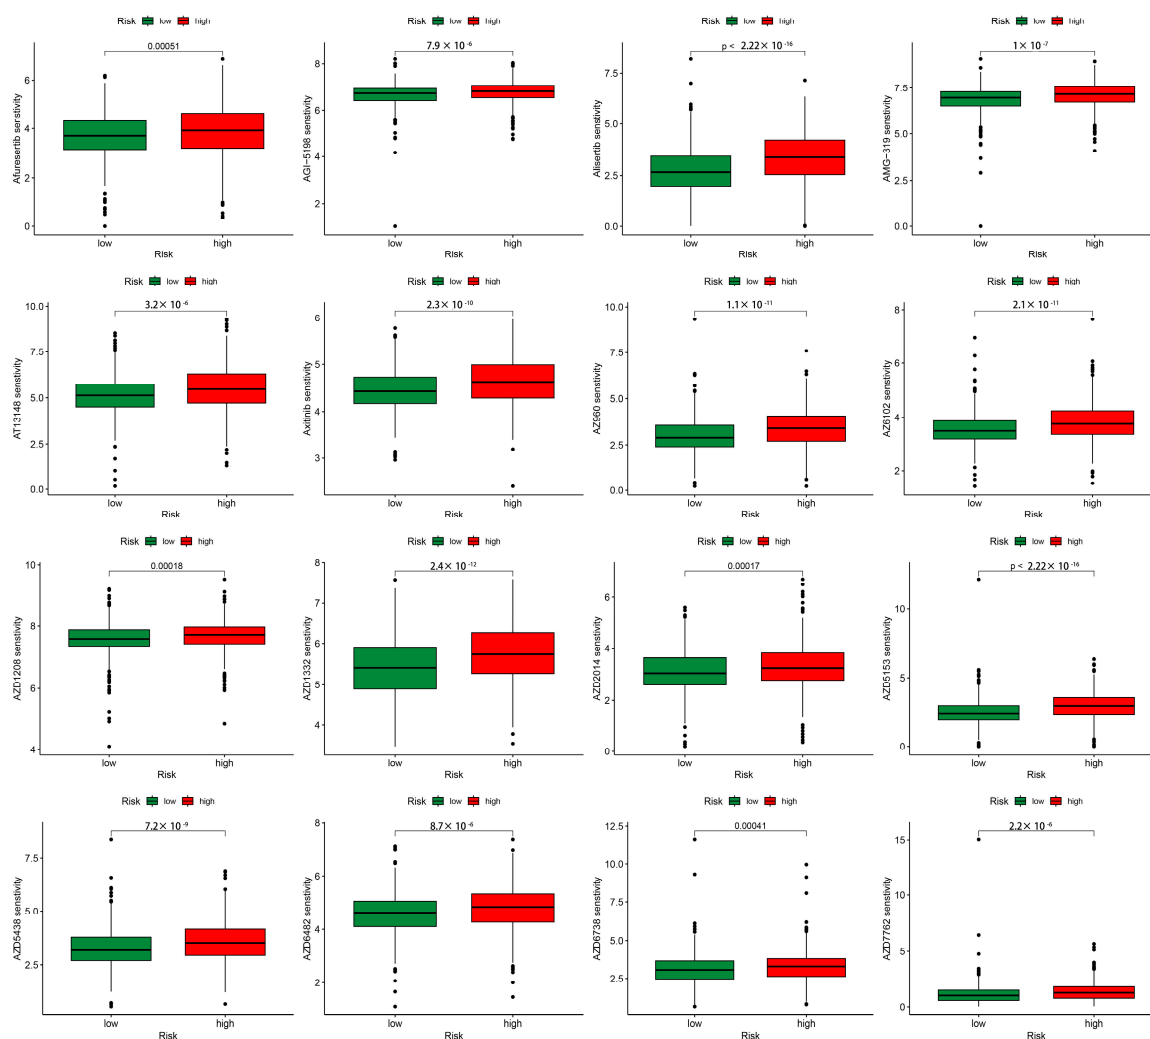

Figure S2. Drug sensitivity of the high- and low-risk groups to parts of drugs.

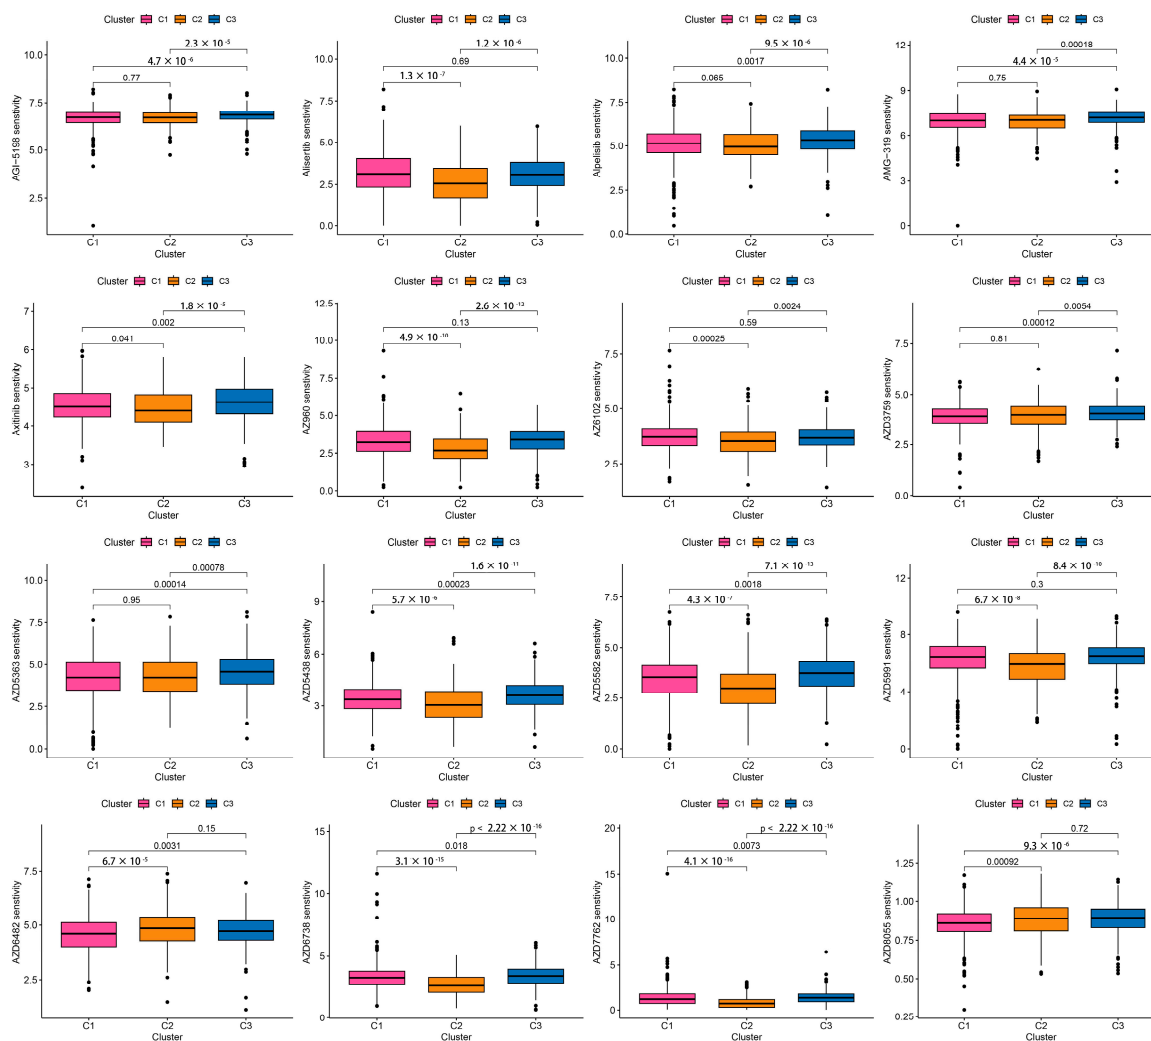

Figure S3. Drug sensitivity of the C1, C2, and C3 clusters to parts of drugs.
